# Supplementary material for: Simultaneous Bering Sea and Labrador Sea ice melt extremes in March 2023: A confluence of meteorological events aligned with stratosphere-troposphere interactions
Source: Copernicus journal article supplement (doi:10.5194/egusphere-2024-925), 2024-04-11
Supplement: Supplementary file 1 [file egusphere-2024-925-supplement.pdf]

# Simultaneous Bering Sea and Labrador Sea ice melt extremes in March 2023: A confluence of meteorological events aligned with stratosphere-troposphere interactions

Ballinger et al.

Submitted to *EGU sphere/Weather and Climate Dynamics* on 28 March 2024

## 1 Introduction

The supplement consists of four figures (**Figure S1-S4**) that are referenced within, but not central to, the main results presented in our manuscript.

## 2 Supplementary Figures

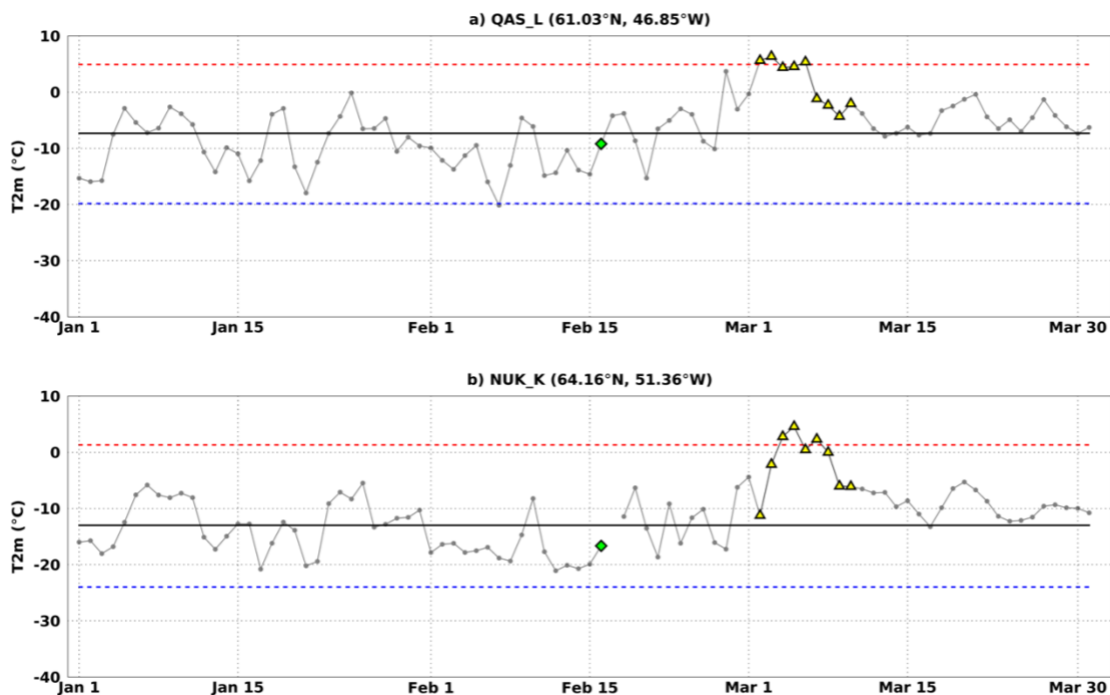

**Figure S1.** GEUS PROMICE weather station two-meter air temperature (T2m) 1 January – 31 March 2023 daily time series (gray lines) overlapping the multi-sectoral melt event for a) QAS\_L and b) NUK\_K. Considering all days from 1 January to 31 March for the respective stations full periods of record (see Section 2.1), the mean T2m (black line), 1<sup>st</sup> percentile (blue dashed line), and 99<sup>th</sup> percentile (red dashed line) are shown in each graphic. The sudden

stratospheric warming event on 16 February 2023 is labeled with a green diamond, and to draw attention to the dates around the Labrador Sea and Bering Sea melt events, the period from 2-10 March 2023 is identified by yellow triangles. Missing data (17 February at NUK\_K) are omitted from respective time series. For reference the weather stations are overlaid on **Figure 1**.

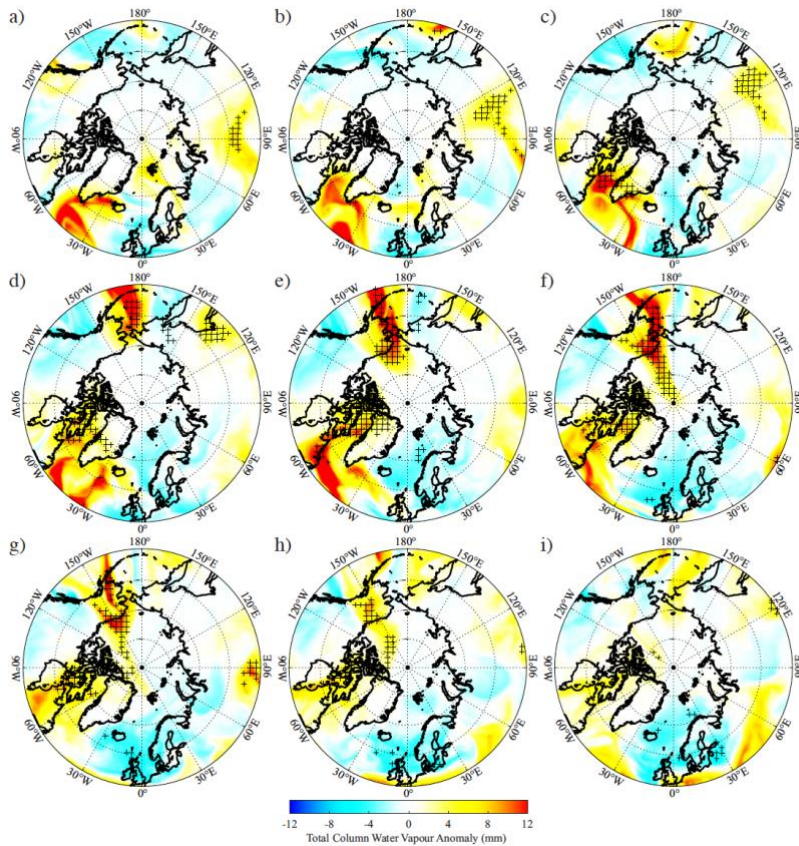

**Figure S2.** Total column water vapor anomaly (mm) from the ERA5 at 0 GMT on: a) 2 March, b) 3 March, c) 4 March, d) 5 March, e) 6 March, f) 7 March, g) 8 March, h) 9 March, and i) 10 March 2023. The anomalies are with respect to the period 16 February – 15 March 1979-2023. Gridpoints where the anomalies are less than the 1st percentile (blue hues) or greater than the 99th percentile (red hues) based on the above period are indicated with the ‘+’.

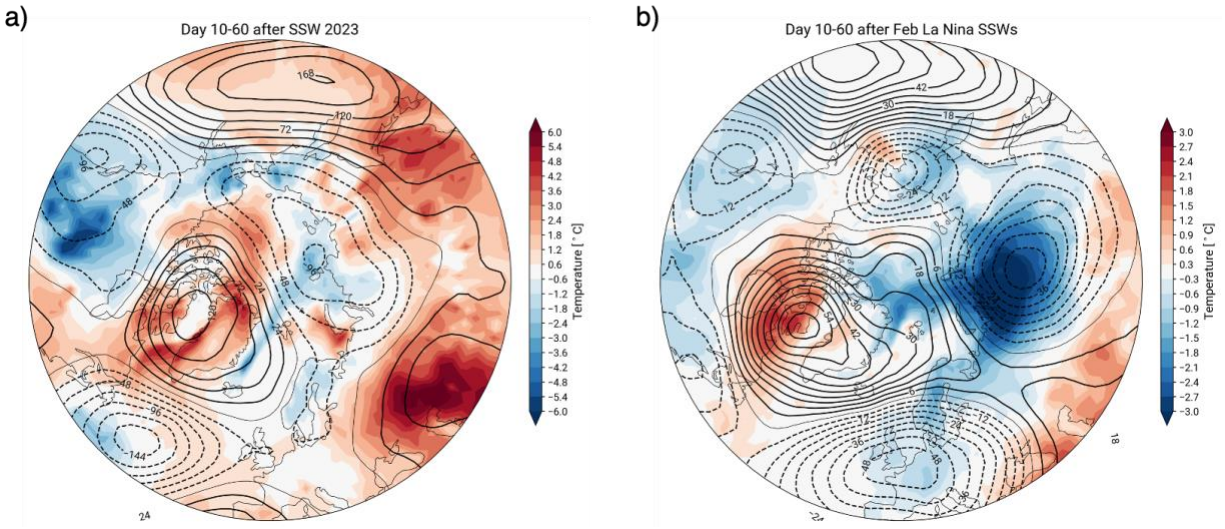

**Figure S3.** a) T2m (shading) and z500 (contours) fields averaged over the 10-60 days following the 2023 SSW event. b) Same as a), but for late January to mid-February SSW onsets that occurred during other La Niña years (1984, 1989, 1999, 2001, 2006, 2008, 2009, and 2018 included). The 10-60 day averaging window is used as the timing of tropospheric response to SSW can vary across events thus requiring a relatively long period to filter out noise.

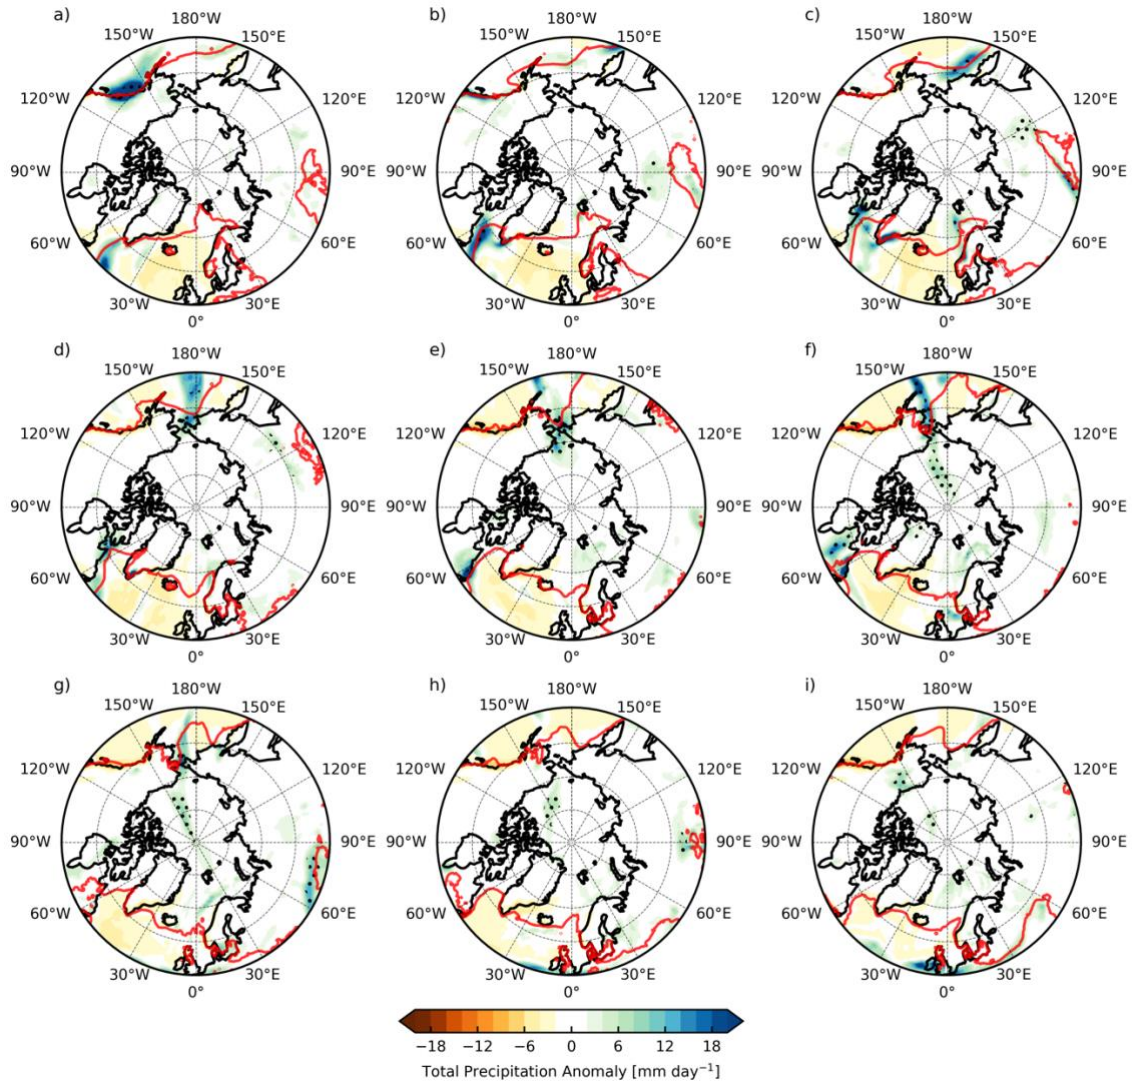

**Figure S4.** Total daily precipitation (in mm/day) from the ERA5 for: a) 2 March, b) 3 March, c) 4 March, d) 5 March, e) 6 March, f) 7 March, g) 8 March, h) 9 March, and i) 10 March 2023. The anomalies are shown with respect to the period 16 February – 15 March 1979–2023. Gridpoints where the anomalies are greater than the 99th percentile (blue hues) based on the above period are indicated with the ‘•’. The red curves represent the 0°C isotherm in the two-meter air temperature fields.
